# Supplementary material
Source: Research Square preprint supplement (doi:10.21203/rs.3.rs-9303768/v1)

**Reviewers/Editors Comments**

Image summarizes the first rejection with possibility to resubmit after the bibliography is been handled.


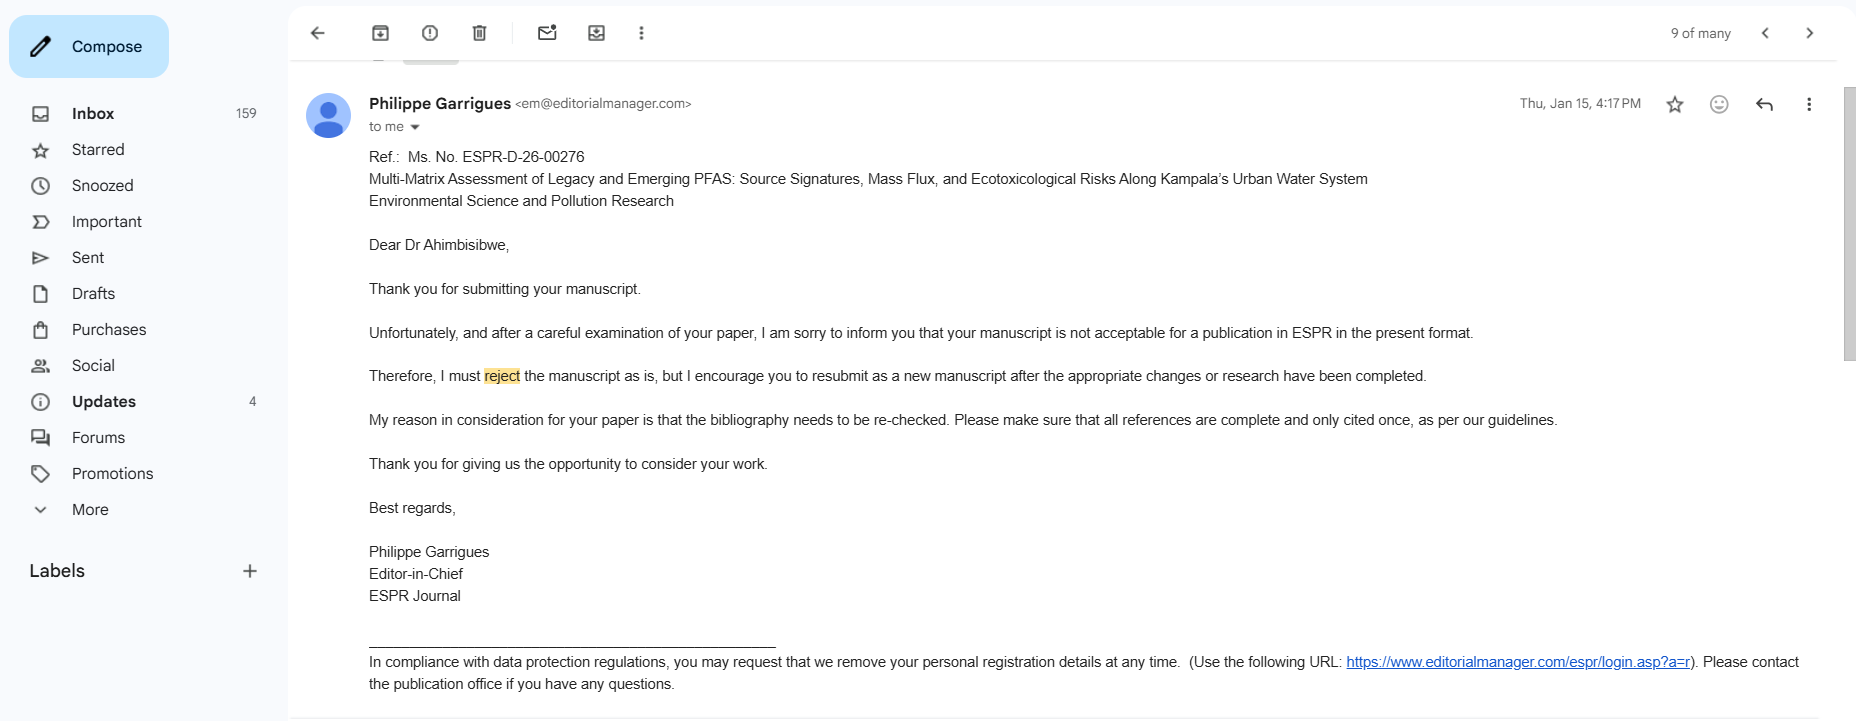


Author response where the changes in the references was made in the table below.

| **Reference** | **Change Type** | **Comment** |
| --- | --- | --- |
| **Sridhar & Gidudu (2020)** | **Edited** | **In the latest list, a DOI link was added: https://doi.org/10.23953/cloud.ijarsg.474 *(doi.org in Bing)*.** |
| **Bahati (2011)** | **Edited** | **In both lists, it is a dissertation/thesis. The latest version includes more detail: *[Undergraduate thesis, Kampala International University]. Kampala International University Institutional Repository.*** |
| **References edited and repetitions removed** |  | **- Coperchini et al. (2024)  - Ebbu et al. (2025)  - Ehsan et al. (2025)  - Eldridge et al. (2025)  - Miiro et al. (2025)  - Ogola (2025)  - Phillip (2025)  - Sapozhnikova & Stroski (2025)  - Vis & Chow (2025)** |

**Review of the metadata**


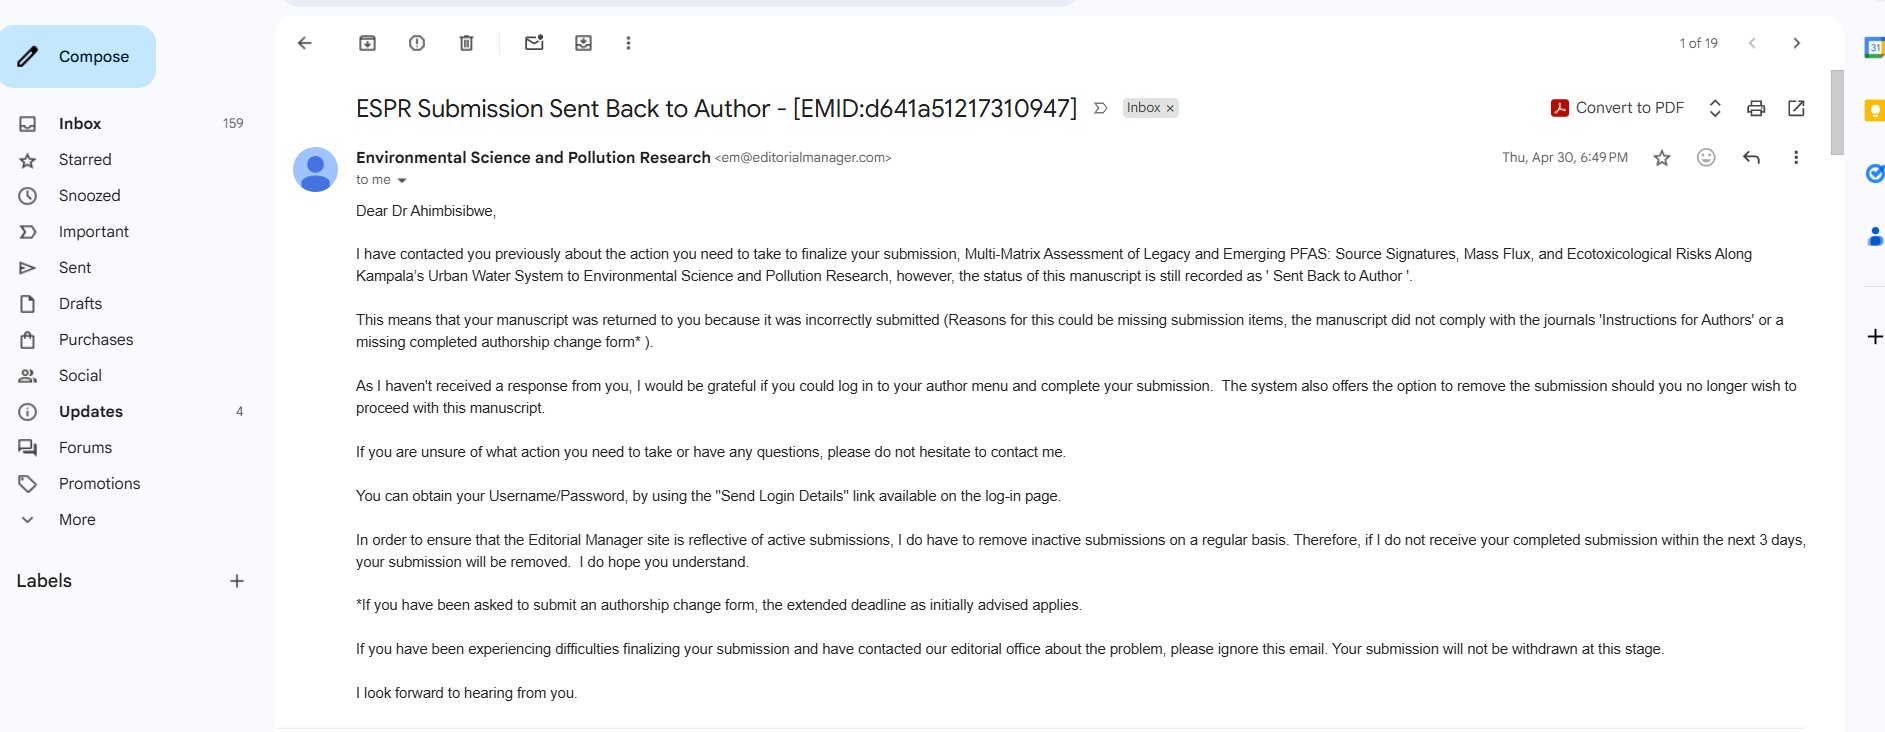


Authors Response, metadata harmonized


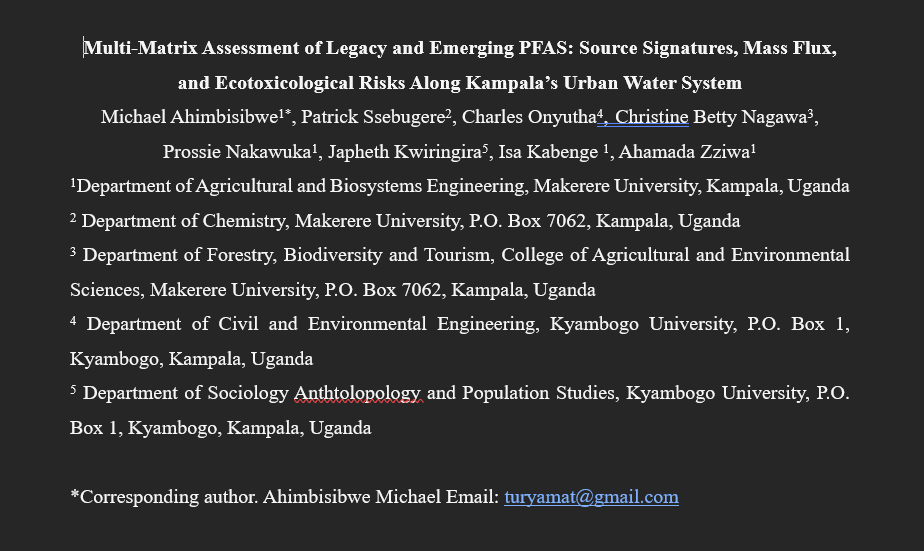


Alignment of metadata in the portal


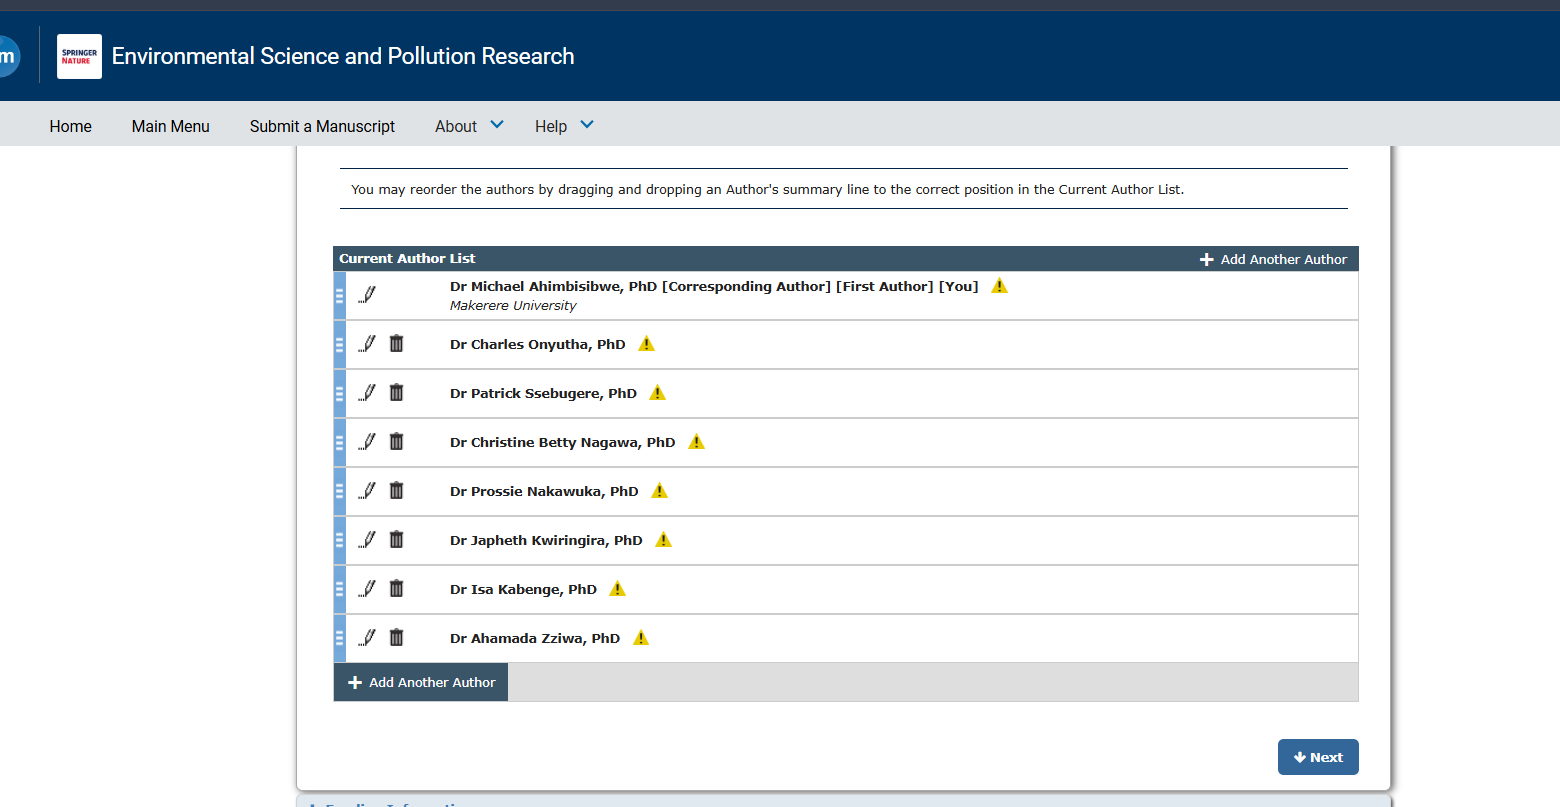

Supplement: Supplementary file 1 [file ed7dc4167191bb83fefc457e.docx]
