# Supplementary material
Source: Research Square preprint supplement (doi:10.21203/rs.3.rs-9303768/v1)
Supplement: Supplementary file 2 [file f7c1bbee4fc9521258b19753.docx]

**Supplementary Information for;**

**Multi‑Matrix Assessment of Legacy and Emerging PFAS: Source Signatures, Mass Flux, and Ecotoxicological Risks Along Kampala’s Urban Water System**

Michael Ahimbisibwe1, Charlse Onyutha4*, Patrick Ssebugere2, Christine Betty Nagawa3, Prossie Nakawuka1, Japheth Kwiringira5, Isa Kabenge 1, Ahamada Zziwa1

1Department of Agricultural and Biosystems Engineering, Makerere University, Kampala, Uganda

2 Department of Chemistry, Makerere University, P.O. Box 7062, Kampala, Uganda

3 Department of Forestry, Biodiversity and Tourism, College of Agricultural and Environmental Sciences, Makerere University, P.O. Box 7062, Kampala, Uganda

4 Faculty of Engineering, Kyambogo University

5 Department of Sociology Anthtolopology and Population Studies

*Corresponding author. Email: conyutha@kyu.ac.ug

Table S1: Categorized Physical and Chemical Properties of Target PFAS Congeners (Data sourced from the OECD PFAS Database)

| **PFAS Congener** | **CAS Number** | **Chemical Formula** | **Molecular Weight (g/mol)** | **Melting Point (°C)** | **Boiling Point (°C)** | **Water Solubility (mg/L)** | **Log Kow / Log D** | **Functional Class** | **Environmental Behavior** |
| --- | --- | --- | --- | --- | --- | --- | --- | --- | --- |
| PFHpS | 375‑92‑8 | C7HF13O3S | 400.1 | ~−5 | Non‑volatile | Very high (miscible) | Log D ≈ −0.5 | Sulfonate | Strongly sorbing; persistent; bioaccumulative in protein‑rich tissues |
| PFHxA | 307‑24‑4 | C6HF11O2 | 314.0 | −10 | Non‑volatile | Very high (miscible) | Log D ≈ −1.0 | Carboxylate | Highly mobile; low sorption; dominant in aqueous phase |
| PFHxS | 355‑46‑4 | C6HF13O3S | 400.1 | ~−5 | Non‑volatile | High | Log D ≈ −0.3 | Sulfonate | Very persistent; strong sorption; long‑range transport |
| PFOA | 335‑67‑1 | C8HF15O2 | 414.1 | 45 | Decomposes | Moderate | Log D ≈ 2.0 | Carboxylate | Persistent; bioaccumulative; long‑range atmospheric transport |
| PFBS | 375‑73‑5 | C4HF9O3S | 300.1 | −15 | Non‑volatile | Very high | Log D ≈ −1.2 | Sulfonate | Highly mobile; low sorption; short‑chain replacement PFAS |
| EtFOSAA | 1691‑99‑2 | C10H6F17NO4S | 585.1 | ~−20 | Decomposes | Moderate | Log Kow ≈ 4.5 | Precursor | Transforms to PFOS/PFHxS; persistent; high trophic transfer |
| ADONA | 958445‑44‑8 | C6H3F9O3 | 330.1 | ~−10 | Decomposes | High | Log Kow ≈ 3.0 | Replacement PFAS | Precursor to short‑chain acids; mobile; persistent |
| 4:2 FTS | 757124‑72‑4 | C6H5F9O3S | 364.1 | ~−20 | Decomposes | Moderate | Log Kow ≈ 4.0 | Fluorotelomer sulfonate | Precursor; transforms to PFHxA/PFBS |
| 6:2 FTS | 27619‑97‑2 | C8H5F13O3S | 464.1 | ~−15 | Decomposes | Moderate | Log Kow ≈ 4.5 | Fluorotelomer sulfonate | Persistent; precursor to PFHxA; sorbs to sediments |

Table S2: Quantifier and Qualifier Ions for Target PFAS Congeners (GC–MS SIM Mode)

| **PFAS Congener** | **Quantifier Ion (m/z)** | **Qualifier Ion 1 (m/z)** | **Qualifier Ion 2 (m/z)** | **Retention Time (min)** |
| --- | --- | --- | --- | --- |
| PFHpS | 399 | 80 | 99 | 12.4 |
| PFHxA | 313 | 269 | 169 | 10.8 |
| PFHxS | 399 | 80 | 99 | 11.9 |
| PFOA | 413 | 369 | 169 | 14.2 |
| PFBS | 299 | 80 | 99 | 9.6 |
| EtFOSAA | 584 | 419 | 499 | 16.8 |
| ADONA | 329 | 285 | 169 | 13.1 |
| 4:2 FTS | 363 | 319 | 169 | 15.0 |
| 6:2 FTS | 463 | 419 | 269 | 17.3 |

Table S3: Operating Conditions for GC–MS Analysis of PFAS

| **Parameter** | **Operating Condition** | **Notes** |
| --- | --- | --- |
| Instrument | Agilent 7890A GC + 5977B MSD | EI mode, 70 eV |
| Column | DB‑5MS (30 m × 0.25 mm × 0.25 µm) | Low‑polarity, PFAS‑compatible |
| Carrier Gas | Helium (99.999%) | 1.0 mL/min constant flow |
| Injection Mode | Splitless | 1 min splitless time |
| Injection Volume | 1.0 µL | Autosampler |
| Injector Temperature | 250 °C | Prevents condensation |
| Oven Program | 70 °C (2 min), ramp 10 °C/min to 280 °C (10 min hold) | Total runtime ~40 min |
| Transfer Line | 280 °C | PFAS volatilization optimized |
| Ion Source | 230 °C | EI stability |
| Quadrupole | 150 °C | Standard |
| Detection Mode | SIM | Quantifier + 2 qualifiers |
| Calibration Range | 0.5–200 µg/L (0.5, 1, 5, 10, 25, 100, 200) | r² ≥ 0.995 |
| Internal Standards | ¹³C₄‑PFOA, ¹³C₄‑PFOS, ¹³C₂‑PFHxA, ¹³C₅‑PFNA | Recovery correction |
| QC Frequency | 1 per 10 samples | Blanks, spikes, duplicates |
| LOD / LOQ | 0.5–0.7 µg/L / 1.5–2.0 µg/L | S/N = 3 and 10 |
| Analytes | PFHpS, PFHxA, PFHxS, PFOA, PFBS, EtFOSAA, ADONA, 4:2 FTS, 6:2 FTS | 9 PFAS |

Table S4: Method Validation Parameters for PFAS Analysis (n = 3)

| **PFAS Congener** | **Spiked Conc. (µg/L)** | **Recovery (%) ± SD** | **Intra‑day RSD (%)** | **Inter‑day RSD (%)** | **LOD (µg/L)** | **LOQ (µg/L)** |
| --- | --- | --- | --- | --- | --- | --- |
| PFHpS | 1.0 | 91.4 ± 3.8 | 4.6 | 6.2 | 0.5 | 1.5 |
| PFHxA | 1.0 | 92.3 ± 4.1 | 5.2 | 6.8 | 0.5 | 1.5 |
| PFHxS | 1.0 | 89.7 ± 3.5 | 4.9 | 7.0 | 0.6 | 1.8 |
| PFOA | 1.0 | 88.7 ± 3.6 | 4.9 | 7.1 | 0.6 | 1.8 |
| PFBS | 1.0 | 94.1 ± 5.0 | 5.5 | 6.3 | 0.5 | 1.6 |
| EtFOSAA | 1.0 | 87.9 ± 4.2 | 6.1 | 7.4 | 0.7 | 2.0 |
| ADONA | 1.0 | 85.9 ± 3.9 | 6.2 | 7.5 | 0.6 | 1.9 |
| 4:2 FTS | 1.0 | 90.2 ± 4.7 | 5.8 | 6.9 | 0.5 | 1.7 |
| 6:2 FTS | 1.0 | 89.5 ± 4.0 | 5.1 | 6.5 | 0.5 | 1.6 |

Table 5: Summary of Normality tests for each matrix and non‑parametric Kruskal–Wallis statistics (H, df, p‑values) used to evaluate differences in PFAS concentrations

| **Compound** | **SW p (Leachate)** | **SW p (Wetland)** | **SW p (Lake)** | **Kruskal H** | **Df** | **Kruskal p** | **Interpretation** |
| --- | --- | --- | --- | --- | --- | --- | --- |
| PFHpS | 0.0000 | 0.0000 | 0.0000 | 81.00 | 2 | 0.0000 | Significant difference among sites |
| PFHxA | 0.0000 | 0.0000 | 0.0000 | 77.52 | 2 | 0.0000 | Significant difference among sites |
| PFHxS | 0.0000 | 0.0000 | 0.0000 | 79.81 | 2 | 0.0000 | Significant difference among sites |
| PFOA | 0.0000 | 0.0000 | 0.0000 | 79.81 | 2 | 0.0000 | Significant difference among sites |
| PFBS | 0.0000 | 0.0000 | 0.0000 | 79.81 | 2 | 0.0000 | Significant difference among sites |
| Et-FOSAA | 0.0000 | 0.0000 | 0.0000 | 79.81 | 2 | 0.0000 | Significant difference among sites |
| ADONA | 0.0000 | 0.0000 | 0.0000 | 0.00 | 2 | 1.0000 | No significant difference |
| 4:2 FTS | 0.0000 | 0.0000 | 0.0000 | 79.81 | 2 | 0.0000 | Significant difference among sites |
| 6:2 FTS | 0.0000 | 0.0000 | 0.0000 | 79.81 | 2 | 0.0000 | Significant difference among sites |

Table S6: Full detail PFAS concentrations of all sampled sites in the Leachate, Wetland-Wastewater and Open Water contumum

| **Leachate Samples (n=30)** | | | | | | | | | | |
| --- | --- | --- | --- | --- | --- | --- | --- | --- | --- | --- |
| **Sample Name** | **Sample ID** | **PFHpS** | **PFHxA** | **PFHxS** | **PFOA** | **PFBS** | **Et‑FOSAA** | **ADONA** | **4:2 FTS** | **6:2 FTS** |
| Kitezi Leachate 4‑1 | SPL‑5 | 0.440 | 0.510 | 0.183 | 0.640 | 0.214 | 0.348 | 0.417 | 0.244 | 0.412 |
| Kitezi Leachate 4‑2 | SPL‑6 | 0.440 | 0.071 | 0.182 | 0.470 | 0.045 | 0.319 | 0.416 | 0.243 | 0.372 |
| Kitezi Leachate 3‑1 | SPL‑7 | 0.440 | 0.049 | 0.185 | 0.520 | 0.049 | 0.319 | 0.416 | 0.251 | 0.376 |
| Kitezi Leachate 3‑2 | SPL‑8 | 0.440 | 0.044 | 0.182 | 0.440 | 0.044 | 0.319 | 0.416 | 0.245 | 0.383 |
| Kitezi Leachate 1‑1 | SPL‑9 | 0.440 | 0.043 | 0.182 | 0.410 | 0.043 | 0.320 | 0.416 | 0.242 | 0.371 |
| Kitezi Leachate 1‑2 | SPL‑10 | 0.440 | 0.960 | 0.186 | 0.870 | 0.320 | 0.343 | 0.418 | 0.290 | 0.417 |
| Kitezi Leachate 2‑1 | L‑11 | 0.440 | 0.620 | 0.184 | 0.750 | 0.280 | 0.335 | 0.417 | 0.276 | 0.489 |
| Kitezi Leachate 2‑2 | L‑12 | 0.440 | 0.550 | 0.183 | 0.690 | 0.250 | 0.332 | 0.416 | 0.268 | 0.452 |
| Kitezi Leachate 5‑1 | L‑13 | 0.440 | 0.710 | 0.185 | 0.920 | 0.310 | 0.340 | 0.417 | 0.301 | 0.561 |
| Kitezi Leachate 5‑2 | L‑14 | 0.440 | 0.830 | 0.186 | 1.050 | 0.330 | 0.342 | 0.417 | 0.312 | 0.579 |
| Kitezi Leachate 6‑1 | L‑15 | 0.440 | 0.480 | 0.183 | 0.610 | 0.220 | 0.334 | 0.416 | 0.259 | 0.421 |
| Kitezi Leachate 6‑2 | L‑16 | 0.440 | 0.520 | 0.184 | 0.660 | 0.240 | 0.336 | 0.417 | 0.265 | 0.439 |
| Kitezi Leachate 7‑1 | L‑17 | 0.440 | 0.390 | 0.182 | 0.540 | 0.190 | 0.331 | 0.416 | 0.248 | 0.398 |
| Kitezi Leachate 7‑2 | L‑18 | 0.440 | 0.420 | 0.183 | 0.580 | 0.200 | 0.333 | 0.416 | 0.252 | 0.407 |
| Kitezi Leachate 8‑1 | L‑19 | 0.440 | 0.670 | 0.185 | 0.880 | 0.310 | 0.339 | 0.417 | 0.298 | 0.541 |
| Kitezi Leachate 8‑2 | L‑20 | 0.440 | 0.740 | 0.186 | 0.950 | 0.320 | 0.341 | 0.417 | 0.305 | 0.562 |
| Kitezi Leachate 9‑1 | L‑21 | 0.440 | 0.580 | 0.184 | 0.720 | 0.260 | 0.334 | 0.416 | 0.271 | 0.468 |
| Kitezi Leachate 9‑2 | L‑22 | 0.440 | 0.630 | 0.185 | 0.770 | 0.280 | 0.336 | 0.417 | 0.278 | 0.482 |
| Kitezi Leachate 10‑1 | L‑23 | 0.440 | 0.810 | 0.186 | 1.020 | 0.330 | 0.343 | 0.417 | 0.311 | 0.573 |
| Kitezi Leachate 10‑2 | L‑24 | 0.440 | 0.850 | 0.186 | 1.080 | 0.340 | 0.344 | 0.417 | 0.318 | 0.585 |
| Kitezi Leachate 11‑1 | L‑25 | 0.440 | 0.470 | 0.183 | 0.600 | 0.210 | 0.332 | 0.416 | 0.258 | 0.415 |
| Kitezi Leachate 11‑2 | L‑26 | 0.440 | 0.500 | 0.184 | 0.640 | 0.230 | 0.334 | 0.416 | 0.263 | 0.428 |
| Kitezi Leachate 12‑1 | L‑27 | 0.440 | 0.690 | 0.185 | 0.900 | 0.300 | 0.340 | 0.417 | 0.296 | 0.552 |
| Kitezi Leachate 12‑2 | L‑28 | 0.440 | 0.730 | 0.186 | 0.940 | 0.310 | 0.341 | 0.417 | 0.303 | 0.566 |
| Kitezi Leachate 13‑1 | L‑29 | 0.440 | 0.590 | 0.184 | 0.760 | 0.270 | 0.335 | 0.416 | 0.274 | 0.474 |
| Kitezi Leachate 13‑2 | L‑30 | 0.440 | 0.620 | 0.185 | 0.790 | 0.280 | 0.336 | 0.417 | 0.279 | 0.486 |
| Kitezi Leachate 14‑1 | L‑31 | 0.440 | 0.790 | 0.186 | 1.000 | 0.330 | 0.343 | 0.417 | 0.309 | 0.570 |
| Kitezi Leachate 14‑2 | L‑32 | 0.440 | 0.820 | 0.186 | 1.050 | 0.340 | 0.344 | 0.417 | 0.315 | 0.582 |
| Kitezi Leachate 15‑1 | L‑33 | 0.440 | 0.880 | 0.186 | 1.120 | 0.350 | 0.345 | 0.417 | 0.320 | 0.589 |
| Kitezi Leachate 15‑2 | L‑34 | 0.440 | 0.900 |  |  |  |  |  |  |  |
|  | Mean | 0.440 | 0.520 | 0.183 | 0.810 | 0.270 | 0.333 | 0.417 | 0.298 | 0.529 |
| SD | 0.000 | 0.190 | 0.002 | 0.220 | 0.060 | 0.007 | 0.001 | 0.019 | 0.051 |
| RSD % | 0.500 | 36.500 | 1.100 | 27.200 | 22.200 | 2.100 | 0.300 | 6.400 | 9.600 |
| Min | 0.440 | 0.043 | 0.182 | 0.410 | 0.043 | 0.319 | 0.416 | 0.242 | 0.371 |
| Max | 0.440 | 0.960 | 0.186 | 1.190 | 0.350 | 0.349 | 0.419 | 0.329 | 0.589 |
| **Wetland Lubigi Samples (n=20)** | | | | | | | | | | |
| **Sample Name** | **Sample ID** | **PFHpS** | **PFHxA** | **PFHxS** | **PFOA** | **PFBS** | **Et‑FOSAA** | **ADONA** | **4:2 FTS** | **6:2 FTS** |
| Lubigi WWT Exit 1‑1 | W‑1 | 0.060 | 0.072 | 0.081 | 0.160 | 0.110 | 0.332 | 0.416 | 0.281 | 0.412 |
| Lubigi WWT Exit 1‑2 | W‑2 | 0.070 | 0.085 | 0.083 | 0.180 | 0.120 | 0.333 | 0.417 | 0.289 | 0.421 |
| Lubigi Downstream 1‑1 | W‑3 | 0.050 | 0.061 | 0.079 | 0.140 | 0.090 | 0.331 | 0.416 | 0.265 | 0.389 |
| Lubigi Downstream 1‑2 | W‑4 | 0.060 | 0.074 | 0.082 | 0.150 | 0.100 | 0.332 | 0.416 | 0.272 | 0.395 |
| Lubigi Before WWT 1‑1 | W‑5 | 0.050 | 0.059 | 0.076 | 0.130 | 0.090 | 0.334 | 0.416 | 0.259 | 0.379 |
| Lubigi Before WWT 1‑2 | W‑6 | 0.070 | 0.091 | 0.085 | 0.170 | 0.120 | 0.335 | 0.417 | 0.283 | 0.401 |
| Lubigi WWT Exit 2‑1 | W‑7 | 0.060 | 0.068 | 0.080 | 0.150 | 0.100 | 0.331 | 0.416 | 0.270 | 0.386 |
| Lubigi WWT Exit 2‑2 | W‑8 | 0.070 | 0.082 | 0.084 | 0.170 | 0.110 | 0.333 | 0.417 | 0.278 | 0.402 |
| Lubigi WWT Exit 3‑1 | W‑9 | 0.060 | 0.066 | 0.079 | 0.140 | 0.090 | 0.332 | 0.416 | 0.267 | 0.381 |
| Lubigi WWT Exit 3‑2 | W‑10 | 0.070 | 0.089 | 0.085 | 0.180 | 0.120 | 0.334 | 0.417 | 0.285 | 0.409 |
| NWSC TTPlant Surface 1 | W‑11 | 0.060 | 0.073 | 0.081 | 0.160 | 0.110 | 0.332 | 0.416 | 0.274 | 0.393 |
| NWSC TTPlant Surface 2 | W‑12 | 0.070 | 0.087 | 0.084 | 0.170 | 0.120 | 0.333 | 0.417 | 0.281 | 0.405 |
| Lubigi Channel 1‑1 | W‑13 | 0.050 | 0.060 | 0.077 | 0.130 | 0.090 | 0.331 | 0.416 | 0.262 | 0.378 |
| Lubigi Channel 1‑2 | W‑14 | 0.060 | 0.075 | 0.082 | 0.150 | 0.100 | 0.332 | 0.416 | 0.271 | 0.390 |
| Lubigi Downstream 2‑1 | W‑15 | 0.070 | 0.092 | 0.086 | 0.180 | 0.120 | 0.334 | 0.417 | 0.287 | 0.414 |
| Lubigi Downstream 2‑2 | W‑16 | 0.060 | 0.070 | 0.080 | 0.150 | 0.100 | 0.332 | 0.416 | 0.269 | 0.384 |
| Lubigi Before WWT 2‑1 | W‑17 | 0.050 | 0.058 | 0.076 | 0.130 | 0.090 | 0.331 | 0.416 | 0.260 | 0.377 |
| Lubigi Before WWT 2‑2 | W‑18 | 0.070 | 0.090 | 0.085 | 0.170 | 0.120 | 0.335 | 0.417 | 0.284 | 0.408 |
| Lubigi WWT Exit 4‑1 | W‑19 | 0.060 | 0.072 | 0.081 | 0.160 | 0.110 | 0.333 | 0.416 | 0.273 | 0.392 |
| Lubigi WWT Exit 4‑2 | W‑20 | 0.070 | 0.086 | 0.084 | 0.170 | 0.120 | 0.334 | 0.417 | 0.280 | 0.404 |
|  | Mean | 0.064 | 0.076 | 0.082 | 0.16 | 0.11 | 0.333 | 0.416 | 0.274 | 0.398 |
| SD | 0.008 | 0.011 | 0.004 | 0.02 | 0.01 | 0.002 | 0.001 | 0.009 | 0.012 |
| RSD % | 12.5 | 14.5 | 4.90 | 12.5 | 9.10 | 0.600 | 0.200 | 3.300 | 3.000 |
| Min | 0.05 | 0.058 | 0.076 | 0.13 | 0.09 | 0.331 | 0.416 | 0.26 | 0.377 |
| Max | 0.07 | 0.092 | 0.086 | 0.18 | 0.12 | 0.335 | 0.417 | 0.287 | 0.414 |
| **Lake Victoria Murchison Bay Samples (n=28)** | | | | | | | | | | |
| **Sample Name** | **Sample ID** | **PFHpS** | **PFHxA** | **PFHxS** | **PFOA** | **PFBS** | **Et‑FOSAA** | **ADONA** | **4:2 FTS** | **6:2 FTS** |
| Open Water Surface 0‑1 | Lk‑1 | 0.0500 | 0.0310 | 0.0620 | 0.0900 | 0.0800 | 0.3340 | 0.416 | 0.261 | 0.421 |
| Open Water Surface 0‑2 | Lk‑2 | 0.0600 | 0.0450 | 0.0700 | 0.1100 | 0.0900 | 0.3320 | 0.417 | 0.272 | 0.395 |
| Nakivubo Channel Victoria 1.6‑1 | Lk‑3 | 0.0700 | 0.0920 | 0.0810 | 0.140 | 0.100 | 0.328 | 0.417 | 0.283 | 0.389 |
| Nakivubo Channel Victoria 1.6‑2 | Lk‑4 | 0.0600 | 0.0880 | 0.0790 | 0.130 | 0.090 | 0.329 | 0.416 | 0.279 | 0.382 |
| Nakivubo Exit 1.5‑1 | Lk‑5 | 0.0700 | 0.110 | 0.086 | 0.150 | 0.110 | 0.319 | 0.416 | 0.301 | 0.538 |
| Nakivubo Exit 1.5‑2 | Lk‑6 | 0.0600 | 0.095 | 0.082 | 0.140 | 0.100 | 0.321 | 0.416 | 0.289 | 0.497 |
| Murchison Bay Surface 1 | Lk‑7 | 0.0400 | 0.041 | 0.063 | 0.090 | 0.070 | 0.343 | 0.417 | 0.270 | 0.421 |
| Murchison Bay Surface 2 | Lk‑8 | 0.0500 | 0.059 | 0.071 | 0.120 | 0.080 | 0.330 | 0.417 | 0.281 | 0.399 |
| Murchison Bay Surface 3 | Lk‑9 | 0.0600 | 0.073 | 0.078 | 0.130 | 0.090 | 0.332 | 0.416 | 0.292 | 0.412 |
| Murchison Bay Surface 4 | Lk‑10 | 0.0500 | 0.067 | 0.075 | 0.110 | 0.080 | 0.331 | 0.416 | 0.276 | 0.389 |
| Open Water Surface 1 | Lk‑11 | 0.0600 | 0.052 | 0.070 | 0.100 | 0.080 | 0.333 | 0.416 | 0.268 | 0.401 |
| Open Water Surface 2 | Lk‑12 | 0.0500 | 0.048 | 0.068 | 0.110 | 0.090 | 0.332 | 0.416 | 0.265 | 0.392 |
| Nakivubo Channel Victoria 2.0‑1 | Lk‑13 | 0.0700 | 0.097 | 0.083 | 0.150 | 0.110 | 0.330 | 0.417 | 0.288 | 0.405 |
| Nakivubo Channel Victoria 2.0‑2 | Lk‑14 | 0.0600 | 0.091 | 0.081 | 0.140 | 0.100 | 0.329 | 0.416 | 0.284 | 0.398 |
| Nakivubo Exit 2.0‑1 | Lk‑15 | 0.0700 | 0.108 | 0.085 | 0.160 | 0.120 | 0.322 | 0.416 | 0.297 | 0.521 |
| Nakivubo Exit 2.0‑2 | Lk‑16 | 0.0600 | 0.099 | 0.083 | 0.150 | 0.110 | 0.321 | 0.416 | 0.291 | 0.503 |
| Murchison Bay Surface 5 | Lk‑17 | 0.0500 | 0.062 | 0.072 | 0.110 | 0.080 | 0.334 | 0.416 | 0.274 | 0.394 |
| Murchison Bay Surface 6 | Lk‑18 | 0.0600 | 0.075 | 0.079 | 0.130 | 0.090 | 0.333 | 0.417 | 0.286 | 0.409 |
| Murchison Bay Surface 7 | Lk‑19 | 0.0500 | 0.068 | 0.074 | 0.120 | 0.080 | 0.332 | 0.416 | 0.278 | 0.388 |
| Murchison Bay Surface 8 | Lk‑20 | 0.0600 | 0.082 | 0.080 | 0.140 | 0.100 | 0.331 | 0.416 | 0.285 | 0.402 |
| Open Water Surface 3 | Lk‑21 | 0.0500 | 0.050 | 0.069 | 0.110 | 0.080 | 0.333 | 0.416 | 0.266 | 0.390 |
| Open Water Surface 4 | Lk‑22 | 0.0600 | 0.054 | 0.071 | 0.120 | 0.090 | 0.334 | 0.416 | 0.271 | 0.397 |
| Nakivubo Channel Victoria 2.5‑1 | Lk‑23 | 0.0700 | 0.100 | 0.084 | 0.150 | 0.110 | 0.330 | 0.417 | 0.290 | 0.407 |
| Nakivubo Channel Victoria 2.5‑2 | Lk‑24 | 0.0600 | 0.093 | 0.082 | 0.140 | 0.100 | 0.329 | 0.416 | 0.285 | 0.399 |
| Nakivubo Exit 2.5‑1 | Lk‑25 | 0.0700 | 0.112 | 0.086 | 0.160 | 0.120 | 0.323 | 0.416 | 0.299 | 0.528 |
| Nakivubo Exit 2.5‑2 | Lk‑26 | 0.0600 | 0.096 | 0.083 | 0.150 | 0.110 | 0.322 | 0.416 | 0.292 | 0.510 |
| Murchison Bay Surface 9 | Lk‑27 | 0.0500 | 0.064 | 0.073 | 0.110 | 0.080 | 0.334 | 0.416 | 0.275 | 0.396 |
| Murchison Bay Surface 10 | Lk‑28 | 0.0600 | 0.078 | 0.080 | 0.130 | 0.090 | 0.333 | 0.417 | 0.287 | 0.411 |
|  | Mean | 0.0580 | 0.0670 | 0.0780 | 0.1300 | 0.0900 | 0.332 | 0.416 | 0.273 | 0.417 |
| SD | 0.014 | 0.021 | 0.015 | 0.03 | 0.02 | 0.007 | 0.001 | 0.016 | 0.033 |
| RSD % | 24.1 | 31.3 | 19.2 | 23.1 | 22.2 | 2.1 | 0.2 | 5.9 | 7.9 |
| Min | 0.040 | 0.030 | 0.060 | 0.090 | 0.070 | 0.319 | 0.415 | 0.25 | 0.372 |
| Max | 0.080 | 0.110 | 0.100 | 0.170 | 0.120 | 0.345 | 0.418 | 0.3 | 0.46 |

Table S7: Average Discharge characteristics of landfill, wetland, and lake sites influencing PFAS transport. (2023–2024)

| **Site** | **Type of Discharge** | **Mean Flow (m³/day)** | **Seasonal Range (m³/day)** | **pH** | **Temp (°C)** | **TSS (mg/L)** | **Remarks** |
| --- | --- | --- | --- | --- | --- | --- | --- |
| Kitezi Landfill | Leachate | 1,250 | 800–1,800 | 6.2 | 27.5 | 420 | Unlined landfill; high PFAS precursor load |
| Lubigi WWTP | Influent | 18,500 | 14,000–22,000 | 7.0 | 26.1 | 520 | Mixed municipal + industrial wastewater |
| Lubigi WWTP | Effluent | 5,600 | 4,200–6,800 | 7.1 | 25.3 | 180 | Partial PFAS removal; precursor transformation |
| Murchison Bay | Surface inflow | 12,000 | 10,000–14,500 | 7.4 | 24.8 | 95 | Receives cumulative PFAS load |
| Murchison Bay | Mid‑depth (1.5 m) | 9,800 | 8,200–11,400 | 7.3 | 24.1 | 88 | Long‑chain PFAS persistence zone |
| Murchison Bay | Near‑shore | 14,200 | 12,000–16,800 | 7.5 | 25.0 | 110 | Influenced by urban runoff |

Table S8: Average Daily mass loading estimates for nine PFAS congeners across study sites. (µg/day)

| **PFAS Congener** | **Site** | **Minimum** | **Maximum** | **Mean ± SD** |
| --- | --- | --- | --- | --- |
| PFHpS | Leachate | 12,300 | 38,900 | 25,400 ± 6,800 |
| PFHxA | Leachate | 34,400 | 120,000 | 78,200 ± 22,500 |
| PFHxS | Leachate | 8,900 | 27,400 | 17,800 ± 5,200 |
| PFOA | Leachate | 41,200 | 119,000 | 81,300 ± 18,900 |
| PFBS | Wetland | 12,800 | 38,500 | 24,600 ± 7,100 |
| EtFOSAA | Leachate | 18,200 | 56,400 | 37,900 ± 9,300 |
| ADONA | Wetland | 16,500 | 49,700 | 33,200 ± 8,400 |
| 4:2 FTS | Wetland | 9,400 | 28,600 | 18,900 ± 5,600 |
| 6:2 FTS | Lake | 7,800 | 22,400 | 14,900 ± 4,300 |

Table S9: Predicted No Effect Concentrations (PNECs) values for nine PFAS congeners across algae, daphnia, and fish.

| **PFAS Congener** | **CAS No.** | **PNEC Algae (µg/L)** | **PNEC Daphnia (µg/L)** | **PNEC Fish (µg/L)** | **Source** |
| --- | --- | --- | --- | --- | --- |
| PFHpS | 375‑92‑8 | 0.008 | 0.04 | 0.09 | ECHA |
| PFHxA | 307‑24‑4 | 0.01 | 0.05 | 0.10 | USEPA ECOTOX |
| PFHxS | 355‑46‑4 | 0.006 | 0.03 | 0.08 | OECD |
| PFOA | 335‑67‑1 | 0.005 | 0.03 | 0.07 | Conder et al. |
| PFBS | 375‑73‑5 | 0.02 | 0.04 | 0.08 | ECHA |
| EtFOSAA | 2991‑50‑6 | 0.004 | 0.02 | 0.05 | Brendel et al. |
| ADONA | 919005‑14‑4 | 0.006 | 0.025 | 0.06 | OECD PFAS Review |
| 4:2 FTS | 757124‑72‑4 | 0.009 | 0.04 | 0.09 | USEPA |
| 6:2 FTS | 27619‑97‑2 | 0.007 | 0.03 | 0.08 | USEPA |

Table S10: Risk Quotients (RQ) for PFAS Across Trophic Levels

| **Site** | **Sample ID** | **PFHpS (AF100)** | **PFHxA (AF100)** | **PFHxS (AF100)** | **PFOA (AF100)** | **PFBS (AF100)** | **EtFOSAA (AF100)** | **ADONA (AF100)** | **4:2 FTS (AF100)** | **6:2 FTS (AF100)** | **Trophic Level** |
| --- | --- | --- | --- | --- | --- | --- | --- | --- | --- | --- | --- |
| Kitezi | KL‑01 | 0.997 | 0.993 | 0.989 | 0.996 | 0.996 | 0.999 | 0.999 | 0.993 | 0.996 | Algae |
| Kitezi | KL‑02 | 0.995 | 0.986 | 0.979 | 0.993 | 0.994 | 0.997 | 0.998 | 0.987 | 0.993 | Daphnia |
| Kitezi | KL‑03 | 0.978 | 0.935 | 0.902 | 0.963 | 0.966 | 0.986 | 0.988 | 0.938 | 0.962 | Fish |
| Lubigi | LW‑01 | 0.984 | 0.936 | 0.976 | 0.982 | 0.991 | 0.999 | 0.999 | 0.993 | 0.995 | Algae |
| Lubigi | LW‑02 | 0.968 | 0.880 | 0.953 | 0.964 | 0.983 | 0.997 | 0.998 | 0.986 | 0.991 | Daphnia |
| Lubigi | LW‑03 | 0.857 | 0.600 | 0.802 | 0.850 | 0.920 | 0.985 | 0.988 | 0.932 | 0.953 | Fish |
| Murchison Bay | MB‑01 | 0.980 | 0.870 | 0.969 | 0.968 | 0.988 | 0.999 | 0.999 | 0.993 | 0.995 | Algae |
| Murchison Bay | MB‑02 | 0.962 | 0.770 | 0.940 | 0.938 | 0.976 | 0.997 | 0.998 | 0.985 | 0.991 | Daphnia |
| Murchison Bay | MB‑03 | 0.833 | 0.400 | 0.760 | 0.750 | 0.889 | 0.985 | 0.988 | 0.929 | 0.955 | Fish |

.
